# Supplementary material for: hsa-miR29b, a critical downstream target of non-canonical Wnt signaling, plays an anti-proliferative role in non-small cell lung cancer cells via targeting MDM2 expression
Source: PubMed Central journal article supplement (PMC3711035; doi:10.1242/bio.20134507), 2013-05-22
Supplement: supp_bio.20134507_bio.20134507-s1.pdf [file supp_bio.20134507_bio.20134507-s1.pdf]

## Supplementary Material

Sreedevi Avasarala et al. doi: 10.1242/bio.20134507

Table S1. PCR array analysis for miRNAs regulated by Wnt7a in A549 cells.

| hsa-miRNA ID    | Fold upregulation |        |        |
|-----------------|-------------------|--------|--------|
|                 | Control           | Wnt 3  | Wnt 7A |
| hsa-miR-335     | 5.03              | 1.88   | 7.11   |
| hsa-miR-135b    | 2.79              | 1.34   | 1.51   |
| hsa-let-7a      | 0.13              | 675.59 | 35.51  |
| hsa-miR-125a-5p | 27.28             | 1.01   | 6.73   |
| hsa-miR-92a     | 0.1               | 1.26   | 6.11   |
| hsa-miR-184     | 0.05              | 1.09   | 1.42   |
| hsa-miR-214     | 0.05              | 2.35   | 1.11   |
| hsa-miR-20a     | 14.03             | 1.35   | 6.73   |
| hsa-let-7g      | 0.57              | 1.53   | 2.91   |
| hsa-miR-29b     | 0.31              | 1.36   | 19.56  |
| has-RNU6-2      | 1.23              | 1.13   | 1.6    |
| hsa-miR-133b    | 0.05              | -1.11  | 1.42   |
| hsa-let-7b      | 0.07              | -1.01  | 4.47   |
| hsa-miR-205     | 0.08              | -1.69  | 1.31   |
| hsa-miR-181a    | 0.07              | -1.38  | 1.15   |
| hsa-miR-199a-3p | 0.05              | -1.09  | 1.59   |
| hsa-miR-140-5p  | 1.6               | -1.11  | 1.42   |
| hsa-miR-193b    | 0.34              | -1.46  | 1.21   |
| hsa-miR-183     | 0.26              | -1.96  | 7.06   |
| hsa-miR-30c     | 7.73              | -1.35  | 1.79   |
| hsa-miR-148a    | 0.37              | -1.11  | 1.42   |
| hsa-miR-134     | 0.11              | -1.47  | 1.47   |
| hsa-miR-138     | 1.18              | -1.16  | 1.73   |
| hsa-miR-373     | 0.05              | -1.16  | 1.01   |
| hsa-let-7c      | 0.08              | -1.11  | 2.17   |
| hsa-let-7e      | 0.91              | 1.03   | 5.58   |
| hsa-miR-218     | 1.29              | -1.41  | 2.28   |
| hsa-miR-21      | 1176.27           | -1.08  | 9.58   |
| hsa-miR-181d    | 0.11              | -1.45  | 1.21   |
| hsa-miR-200c    | 0.48              | -1.06  | 3.63   |
| hsa-miR-100     | 200.85            | -1.21  | 10.34  |
| hsa-miR-10b     | 41.93             | -1.25  | 9.32   |
| hsa-miR-1       | 0.36              | -1.11  | 1.42   |
| hsa-miR-363     | 0.05              | -1.11  | 1.42   |
| hsa-let-7i      | 0.32              | -1.44  | 1.47   |
| hsa-miR-27b     | 106.89            | 1.13   | 5.5    |
| hsa-miR-7       | 14.52             | 1.33   | 2.89   |
| hsa-miR-127-5p  | 0.11              | -1.6   | 2.13   |
| hsa-miR-191     | 2.89              | -1.16  | 3.76   |
| hsa-let-7d      | 0.06              | -1.27  | 1.28   |
| hsa-miR-9       | 5.43              | -1.39  | 1.74   |
| hsa-let-7f      | 0.15              | -1.11  | 1.42   |
| hsa-miR-10a     | 172.45            | 1.2    | 12.21  |
| hsa-miR-181b    | 0.07              | -1.45  | 1.01   |
| hsa-miR-15b     | 6.41              | -1.06  | 5.39   |
| hsa-miR-16      | 83.29             | 1.09   | 5.5    |
| hsa-miR-210     | 0.11              | 1.03   | 1.12   |
| hsa-miR-17      | 5.28              | -1.58  | 1.15   |
| hsa-miR-25      | 19.56             | 1.05   | 5.98   |
| hsa-miR-144     | 0.13              | -1.11  | 1.42   |
| hsa-miR-128     | 0.37              | 1.05   | 7.84   |
| hsa-miR-215     | 2.83              | -2.01  | 2.99   |
| hsa-miR-19a     | 21.71             | -1.09  | 2.45   |
| hsa-miR-193a-5p | 0.13              | -1.27  | 1.17   |
| hsa-miR-18a     | 1.39              | -1.62  | 1.44   |
| hsa-miR-125b    | 48.5              | 1.66   | 8.4    |
| hsa-miR-126     | 67.18             | -1.11  | 4.44   |
| hsa-miR-27a     | 31.12             | -1.25  | 4      |
| hsa-miR-149     | 0.07              | -1.11  | 1.42   |
| hsa-miR-23b     | 48.5              | -1.11  | 1.42   |
| hsa-miR-203     | 0.08              | -1.11  | 1.42   |
| hsa-miR-32      | 1.38              | -1.11  | 1.42   |
| hsa-miR-181c    | 0.08              | -1.39  | 4.44   |

Table S1. Continued.

| hsa-miRNA ID    | Fold upregulation   |       |        |
|-----------------|---------------------|-------|--------|
|                 | Control             | Wnt 3 | Wnt 7A |
| SNORD47         | 0.4                 | -1.11 | 1.42   |
| hsa-miR-196a    | 0.45                | -1.17 | 1.56   |
| hsa-miR-142-5p  | 0.11                | -1.11 | 1.42   |
| hsa-miR-96      | 1.17                | -1.11 | 1.42   |
| hsa-miR-148b    | 0.35                | -1.25 | 1.27   |
| hsa-miR-18b     | 0.08                | -1.39 | 1.39   |
| miRNA ID        | Fold downregulation |       |        |
|                 | Control             | Wnt 3 | Wnt 7A |
| hsa-miR-122     | 0.03                | -1.65 | -1.04  |
| hsa-miR-20b     | 1.88                | -1.06 | 1.67   |
| hsa-miR-222     | 0.06                | -1.21 | -1.13  |
| hsa-miR-15a     | 1                   | -2.01 | -1.15  |
| hsa-miR-378     | 0.44                | -1.57 | -1.47  |
| hsa-miR-146b-5p | 0.17                | -1.8  | -1.14  |
| hsa-miR-34c-5p  | 0.15                | -1.65 | -1.27  |
| hsa-miR-146a    | 0.52                | -1.51 | -1.16  |
| hsa-miR-212     | 0.08                | -1.55 | -1.09  |
| hsa-miR-206     | 0.07                | -1.18 | -1.11  |
| hsa-miR-124     | 0.07                | -1.54 | -1.06  |
| hsa-miR-301a    | 2.06                | -2.22 | -1.4   |
| hsa-miR-155     | 0.06                | -2.53 | -1.6   |
| hsa-miR-150     | 0.07                | -1.47 | -1.21  |
| hsa-miR-29a     | 2.46                | -1.43 | -1.3   |
| hsa-miR-98      | 0.18                | -1.91 | -1.03  |
| hsa-miR-34a     | 0.05                | -1.73 | -1.71  |
| hsa-miR-143     | 0.06                | -1.65 | -1.19  |
| hsa-miR-372     | 0.06                | -1.55 | -1.04  |
| SNORD48         | 0.05                | -1.49 | -1.19  |
| SNORD44         | 43.11               | 1.46  | -1.92  |
